# Supplementary material
Source: ML conference proceedings conference paper supplement (https://openaccess.thecvf.com/content/CVPR2022/html/Li_Deep_Hyperspectral-Depth_Reconstruction_CVPR_2022_paper.html)
Supplement: Supplementary file 2 [file Li_Deep_Hyperspectral-Depth_Reconstruction_CVPR_2022_supplemental.zip]

Archive with 2 entries (2 files):
- CVPR2022_Supplementary_doc.pdf
- CVPR2022_Supplementary_video.mp4
